# Supplementary material for: Clinically compliant spatial and temporal imaging of chimeric antigen receptor T-cells
Source: PubMed Central journal article supplement (PMC5852048; doi:10.1038/s41467-018-03524-1), 2018-03-14
Supplement: 41467_2018_3524_MOESM3_ESM.pdf [file 41467_2018_3524_MOESM3_ESM.pdf]

## **Description of Additional Supplementary Files**

**File Name: Supplementary Movie 1**

**Description:** 4PTrN day 4 post T cell treatment.

**File Name: Supplementary Movie 2**

**Description:** 4PTrN day 9 post T cell treatment.

**File Name: Supplementary Movie 3**

**Description:** 4PTrN day 14 post T cell treatment.

**File Name: Supplementary Movie 4**

**Description:** 4P28ζN day 4 post T cell treatment.

**File Name: Supplementary Movie 5**

**Description:** 4P28ζN day 9 post T cell treatment

**File Name: Supplementary Movie 6**

**Description:** 4P28ζN day 14 post T cell treatment.
